# Supplementary material
Source: PubMed Central journal article supplement (PMC6530582)
Supplement: NIHMS1026191-supplement-Supp_table_1.pdf [file NIHMS1026191-supplement-Supp_table_1.pdf]

Supplementary Table. Proportion of PLNM among patients who received prostatectomy and who didn't receive prostatectomy. Values represent n (%) per year.

| <b>Year:</b>                      | <b>2004</b> | <b>2005</b> | <b>2006</b> | <b>2007</b> | <b>2008</b> | <b>2009</b> | <b>2010</b> | <b>2011</b> | <b>2012</b> | <b>2013</b> | <b>2014</b> |
|-----------------------------------|-------------|-------------|-------------|-------------|-------------|-------------|-------------|-------------|-------------|-------------|-------------|
| <b>All men 50 years and older</b> |             |             |             |             |             |             |             |             |             |             |             |
| RP                                | 307(2.0)    | 307(2.1)    | 332(2.0)    | 397(2.1)    | 401(2.2)    | 417(2.2)    | 457(2.5)    | 467(2.5)    | 508(3.4)    | 549(3.9)    | 613(4.7)    |
| Non-RP                            | 215(0.7)    | 220(0.7)    | 215(0.6)    | 236(0.7)    | 239(0.7)    | 251(0.8)    | 294(0.9)    | 284(0.9)    | 255(0.9)    | 296(1.0)    | 372(1.4)    |
| <b>Age Stratified</b>             |             |             |             |             |             |             |             |             |             |             |             |
| <b>50 to 74 years old</b>         |             |             |             |             |             |             |             |             |             |             |             |
| RP                                | 299(2.0)    | 290(2.1)    | 316(1.9)    | 376(2.1)    | 379(2.1)    | 398(2.2)    | 437(2.4)    | 437(2.4)    | 481(3.3)    | 518(3.8)    | 583(4.7)    |
| Non-RP                            | 176(0.8)    | 190(0.9)    | 179(0.8)    | 185(0.8)    | 183(0.8)    | 195(0.8)    | 226(0.9)    | 209(0.8)    | 187(0.9)    | 214(1.0)    | 270(1.4)    |
| <b>75 years and older</b>         |             |             |             |             |             |             |             |             |             |             |             |
| RP                                | 8(2.0)      | 17(4.4)     | 16(3.7)     | 21(4.2)     | 22(4.9)     | 19(4.2)     | 20(3.9)     | 30(5.6)     | 27(6.1)     | 31(7.0)     | 30(7.0)     |
| Non-RP                            | 39(0.4)     | 30(0.3)     | 36(0.3)     | 51(0.5)     | 56(0.6)     | 56(0.6)     | 68(0.8)     | 75(0.9)     | 68(1.0)     | 82(1.3)     | 102(1.7)    |

P trend<0.05 for all groups from Cochran-Armitage trend test
